# Supplementary material for: A novel bis-component AIE smart gel with high selectivity and sensitivity to detect CN−, Fe3+ and H2PO4−
Source: Royal Society of Chemistry journal article supplement (doi:10.1039/c9sm01035a), 2019-01-01
Supplement: c9sm01035a1.pdf [file c9sm01035a1.pdf]

## Supporting Information

### **A novel bis-component AIE smart gel high selectively and sensitively detect $\text{CN}^-$ , $\text{Fe}^{3+}$ and $\text{H}_2\text{PO}_4^-$**

Guan-Fei Gong <sup>a</sup>, Yan-Yan Chen <sup>a</sup>, You-Ming Zhang <sup>a, b\*</sup>, Yan-Qing Fan <sup>a</sup>, Qi Zhou <sup>a</sup>, Hai-Long Yang <sup>a</sup>,  
Qin-Peng Zhang <sup>a</sup>, Hong Yao <sup>a</sup>, Tai-Bao Wei <sup>a</sup>, Qi Lin <sup>a\*</sup>

<sup>a</sup> Guan-Fei Gong, Yan-Yan Chen, You-Ming Zhang, Yan-Qing Fan, Qi Zhou, Hai-Long Yang, Qin-Peng Zhang, Hong Yao, Tai-Bao Wei and Qi Lin. Key Laboratory of Eco-Environment-Related Polymer Materials, Ministry of Education of China, Key Laboratory of Polymer Materials of Gansu Province, College of Chemistry and Chemical Engineering, Northwest Normal University, Lanzhou, 730070, China. E-mail: linqi2004@126.com.

<sup>b</sup> You-Ming Zhang. College of Chemistry and Chemical Engineering, Lanzhou City University, Lanzhou, 730070, China. E-mail: zhangnwnu@126.com.

## Table of Contents

|                                                                                                                                                                                                              |    |
|--------------------------------------------------------------------------------------------------------------------------------------------------------------------------------------------------------------|----|
| <b>Materials and methods</b> .....                                                                                                                                                                           | 4  |
| <b>General Procedure</b> .....                                                                                                                                                                               | 4  |
| <b>Preparation of the bis-component AIE-gel TG</b> .....                                                                                                                                                     | 4  |
| <sup>1</sup> H NMR experiments.....                                                                                                                                                                          | 4  |
| <b>Preparation of TG-Fe</b> .....                                                                                                                                                                            | 5  |
| <b>Inductively coupled plasma (ICP) experiment</b> .....                                                                                                                                                     | 5  |
| <b>Calculation formula of LOD</b> .....                                                                                                                                                                      | 5  |
| <b>Calculate method of adsorption percentage</b> .....                                                                                                                                                       | 5  |
| <b>Scheme S1</b> Synthesis of <b>TNA</b> and <b>G</b> .....                                                                                                                                                  | 5  |
| <b>Fig. S1</b> <sup>1</sup> H NMR Spectrum of <b>TNA</b> in DMSO- <i>d</i> <sub>6</sub> (600 MHz, 298K).....                                                                                                 | 6  |
| <b>Fig. S2</b> <sup>13</sup> C NMR Spectrum of <b>TNA</b> in DMSO- <i>d</i> <sub>6</sub> (150 MHz, 298K).....                                                                                                | 6  |
| <b>Fig. S3</b> Mass spectrum of <b>TNA</b> .....                                                                                                                                                             | 6  |
| <b>Fig. S4</b> FT-IR spectrum of <b>TNA</b> in KBr disk.....                                                                                                                                                 | 7  |
| <b>Fig. S5</b> <sup>1</sup> H NMR spectrum of <b>G</b> in DMSO- <i>d</i> <sub>6</sub> (400 MHz, 298K).....                                                                                                   | 7  |
| <b>Fig. S6</b> <sup>13</sup> C NMR spectrum of <b>G</b> in DMSO- <i>d</i> <sub>6</sub> (150 MHz, 298K).....                                                                                                  | 8  |
| <b>Fig. S7</b> Mass spectrum of <b>G</b> .....                                                                                                                                                               | 8  |
| <b>Fig. S8</b> FT-IR spectrum of <b>G</b> in KBr disk.....                                                                                                                                                   | 8  |
| <b>Table S1</b> Gelation properties of <b>TG</b> in organic solvents.....                                                                                                                                    | 9  |
| <b>Fig. S9</b> Mass spectrum of <b>TG</b> .....                                                                                                                                                              | 9  |
| <b>Fig. S10</b> FT-IR spectra of <b>TNA</b> , <b>G</b> and <b>TG</b> .....                                                                                                                                   | 10 |
| <b>Fig. S11</b> XRD pattern of the <b>TNA</b> and <b>TG</b> .....                                                                                                                                            | 10 |
| <b>Fig. S12</b> FE-SEM images of a) <b>TNA</b> and b) <b>G</b> .....                                                                                                                                         | 10 |
| <b>Fig. S13</b> Fluorescent spectrum linear range for CN <sup>-</sup> by addition of various concentrations of CN <sup>-</sup> to <b>TG</b> .....                                                            | 11 |
| <b>Fig. S14</b> Fluorescent spectra changes ( $\lambda_{ex} = 380$ nm) of <b>TG</b> with addition of different cations aqueous solution.....                                                                 | 11 |
| <b>Fig. S15</b> Emission spectra of <b>TG</b> with increasing amounts of Fe <sup>3+</sup> .....                                                                                                              | 12 |
| <b>Fig. S16</b> Photograph of <b>TG</b> -based film fluorescently detect Fe <sup>3+</sup> in water solution.....                                                                                             | 12 |
| <b>Fig. S17</b> Fluorescent spectrum linear range for Fe <sup>3+</sup> by addition of various concentrations of Fe <sup>3+</sup> to <b>TG</b> .....                                                          | 12 |
| <b>Table S2</b> The ICP data of <b>TG</b> with Fe <sup>3+</sup> .....                                                                                                                                        | 13 |
| <b>Fig. S18</b> Fluorescent spectra changes ( $\lambda_{ex} = 380$ nm) of <b>TG-Fe</b> with addition of different anions aqueous solution.....                                                               | 13 |
| <b>Fig. S19</b> Fluorescent spectrum linear range for H <sub>2</sub> PO <sub>4</sub> <sup>-</sup> by addition of various concentrations of H <sub>2</sub> PO <sub>4</sub> <sup>-</sup> to <b>TG-Fe</b> ..... | 13 |

**Fig. S20** Partial  $^1\text{H}$  NMR spectra of 5.0 mg **TG** in  $\text{DMSO-}d_6$  with different equivalent  $\text{CN}^-$  (a) 0 equiv.; (b) 0.2 equiv.; (c) 0.4 equiv.; (d) 1.0 equiv.; (e) 2.0 equiv. ....14

**Fig. S21** FT-IR spectra of **TG**, **TG** +  $\text{Fe}^{3+}$  and **TG-Fe** +  $\text{H}_2\text{PO}_4^-$  .....14

**Notes and references** ..... 14

## Materials and methods

All cations were used as the perchlorate salts, while all anions were used as the Tetrabutyl ammonium salts, which were purchased from Alfa Aesar and used as received. Fresh double distilled water was used throughout the experiment. Nuclear Magnetic Resonance (NMR) spectra were recorded on Varian Mercury 400 instruments. Mass spectra were recorded on a Bruker Esquire 6000 MS instrument. The infrared spectra were performed on a Digilab FTS-3000 Fourier transform-infrared spectrophotometer. The morphologies of the gel were characterized using field emission scanning electron microscopy (FE-SEM, UL TRA plus). The X-ray diffraction analysis (XRD) was performed in a transmission mode with a Rigaku RINT2000 diffractometer equipped with graphite monochromated CuK $\alpha$  radiation ( $\lambda = 1.54073 \text{ \AA}$ ). Fluorescence spectra were recorded on a Shimadzu RF-5301PC spectrofluorophotometer.

## General Procedure

### Preparation of the bis-component AIE-gel TG

The mixture of **TNA** (12.86 mg,  $1.6 \times 10^{-5} \text{ M}$ ) and **G** (7.14 mg,  $1.6 \times 10^{-5} \text{ M}$ ) were added into a binary solution of DMSO and H<sub>2</sub>O (V/V, 7.4 : 2.6, 0.275 mL), the mixture was heated dissolve, then cooled it to room temperature, obtaining stable bis-components gel **TG**.

### <sup>1</sup>H NMR experiments

**(1) <sup>1</sup>H NMR titration experiments of guest G to host TNA.** The **TNA** ( $5 \text{ mg}$ ,  $1.3 \times 10^{-2} \text{ M}$ ) was dissolved in the DMSO-*d*<sub>6</sub> (0.5 mL), then, a series of different equivalent of guest **G** (0.1 M) were added into the solution of **TNA** and recorded their <sup>1</sup>H NMR respectively.

**(2) The concentrations-dependent <sup>1</sup>H NMR of TG (TNA/G, 1 : 1, n/n):** A series of DMSO-*d*<sub>6</sub> (0.5 mL) solutions of **TG** with different concentrations (7.57 mM; 12.6 mM; 17.7 mM; 27.8 mM) were prepared. Then record their <sup>1</sup>H NMR respectively.

**(3) <sup>1</sup>H NMR titration experiments of TG to CN<sup>-</sup>.** The **TG** ( $1.3 \times 10^{-2} \text{ M}$ ) was dissolved in the DMSO-*d*<sub>6</sub> (0.5 mL), then a series of **CN<sup>-</sup>** (0.1 M, DMSO-*d*<sub>6</sub>) were added into the solution of **TG** and recorded their <sup>1</sup>H NMR respectively.

### Preparation of TG-Fe

The Fe<sup>3+</sup> of 0.2 equiv. was added into the TG (0.275 mL), the mixture was heated dissolve, then cooled it to room temperature, obtaining stable TG-Fe.

### Inductively coupled plasma (ICP) experiment

The xerogel of TG (2.0 mg) was suspended in a dilute aqueous solution of Fe<sup>3+</sup> (1 × 10<sup>-5</sup> M, 10.0 mL). After the mixture was stirred at room temperature for 1 h, we separated the precipitate by centrifugation (20 min) and obtained the supernatant and using the supernatant for ICP analysis.

### Calculation formula of LOD

Formula 1: Linear Equation:  $y = Ax + B$

$$\delta = \sqrt{\frac{\sum (x_i - \bar{x})^2}{n - 1}} \quad (n = 20)$$

Formula 2:

$$LOD = K \times \frac{\delta}{S} \quad (K = 3)$$

Formula 3:

$$S = A \times 10^6$$

### Calculate method of adsorption percentage

$$\text{Adsorption percentage (\%)} = \left(1 - \frac{C_1 \times V_1}{C_0 \times V_0}\right) \times 100\%$$

(State: C<sub>1</sub> is the residual concentration of Fe<sup>3+</sup>, C<sub>0</sub> is the initial concentration of Fe<sup>3+</sup>, V<sub>1</sub> = V<sub>0</sub>).

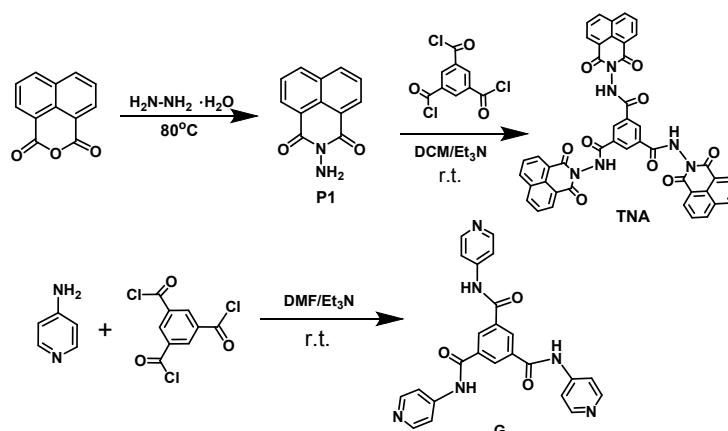

Scheme S1 Synthesis of TNA and G.

**TNA** and **G** were synthesized according to our previous reported method,<sup>S1, S2</sup> respectively.

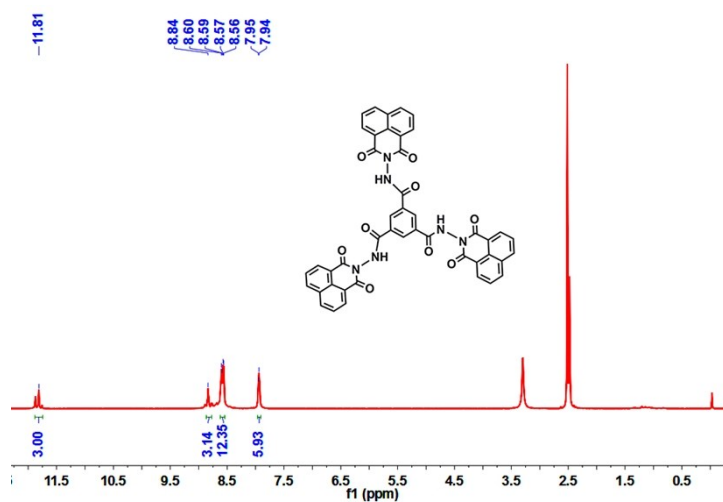

**Fig. S1**  $^1\text{H}$  NMR Spectrum of **TNA** in  $\text{DMSO-}d_6$  (600 MHz, 298K).

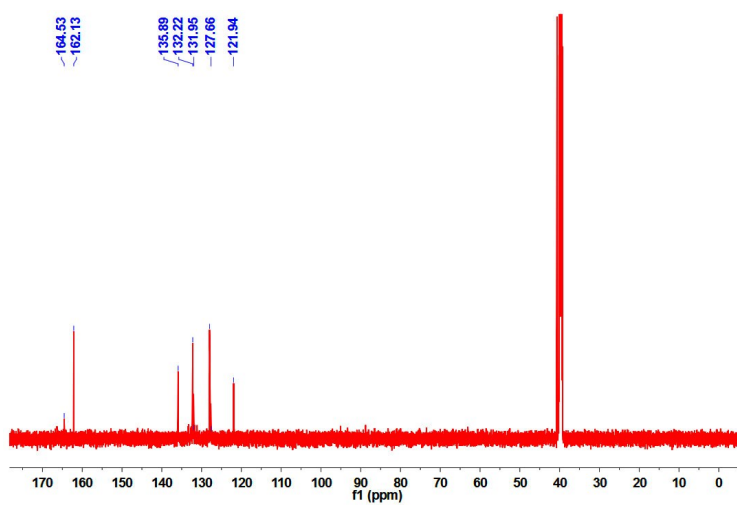

**Fig. S2**  $^{13}\text{C}$  NMR Spectrum of **TNA** in  $\text{DMSO-}d_6$  (150 MHz, 298K).

### User Spectra

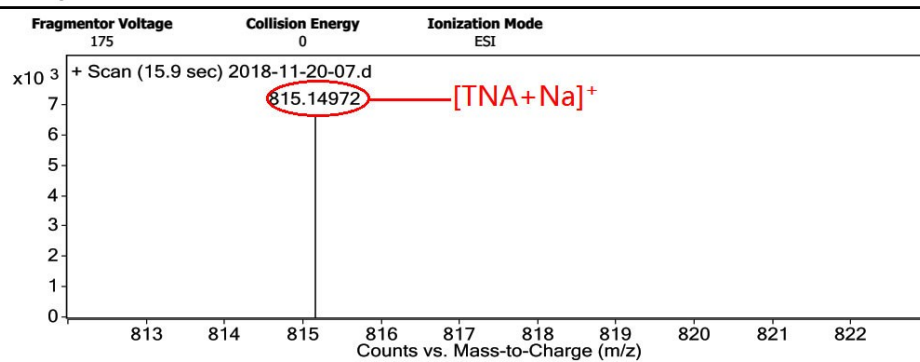

**Fig. S3** Mass spectrum of **TNA**.

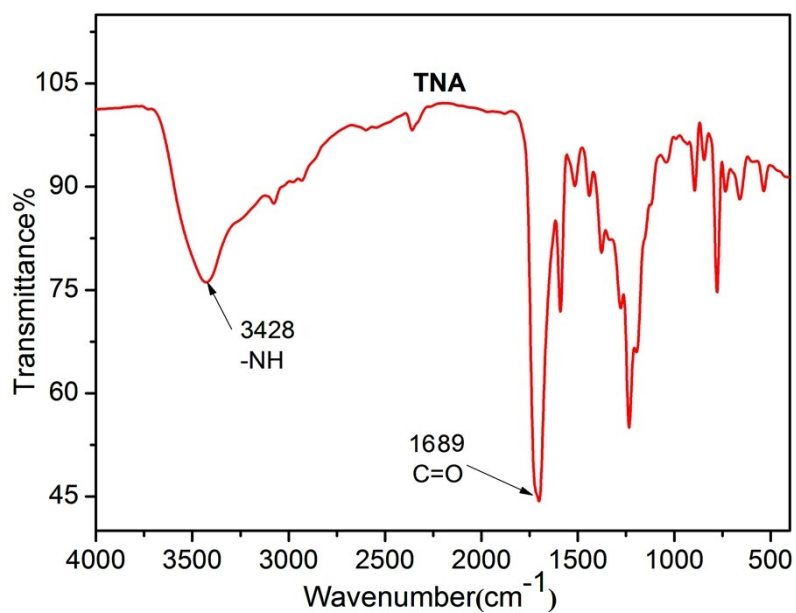

**Fig. S4** FT-IR spectrum of **TNA** in KBr disk.

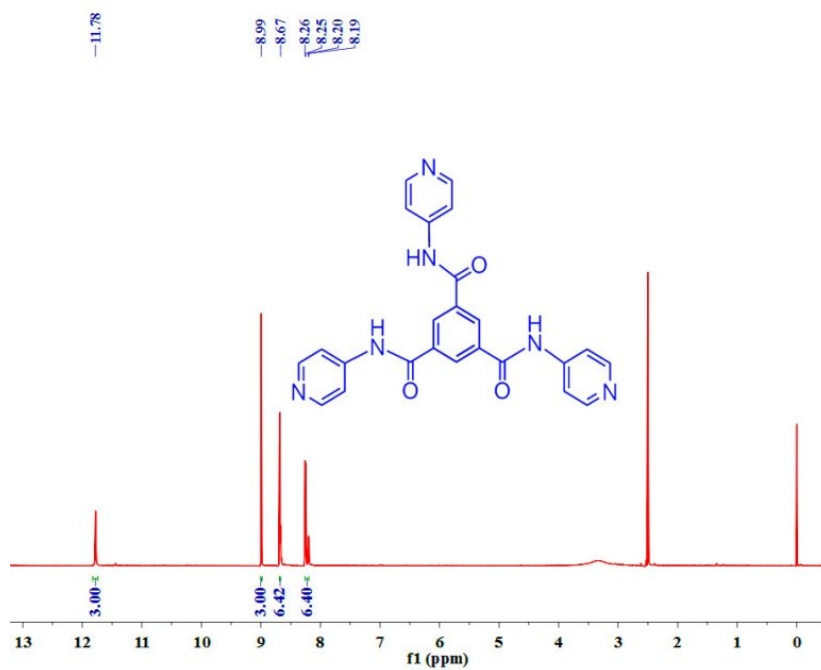

**Fig. S5**  $^1\text{H}$  NMR spectrum of **G** in  $\text{DMSO-}d_6$  (400 MHz, 298K).

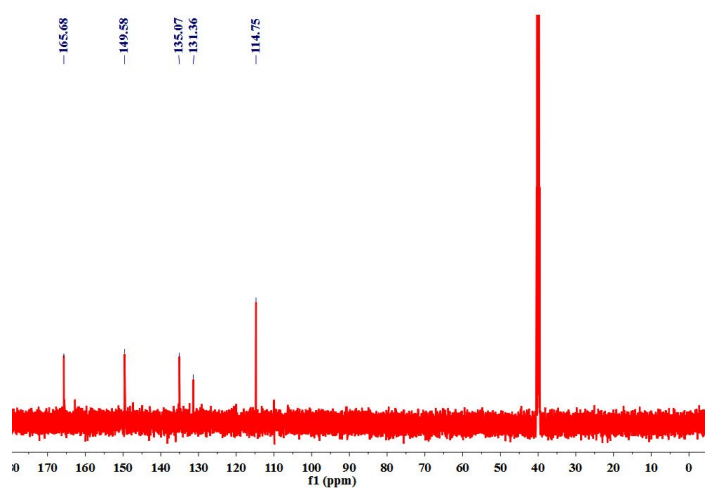

**Fig. S6**  $^{13}\text{C}$  NMR spectrum of **G** in  $\text{DMSO-}d_6$  (150 MHz, 298K).



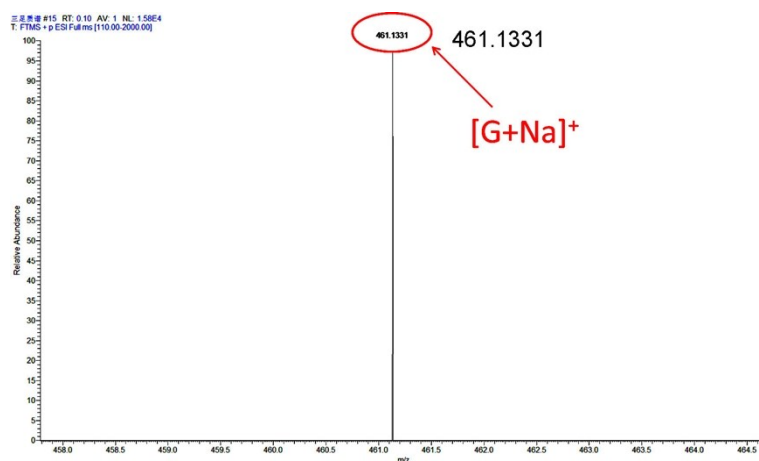

**Fig. S7** Mass spectrum of **G**.

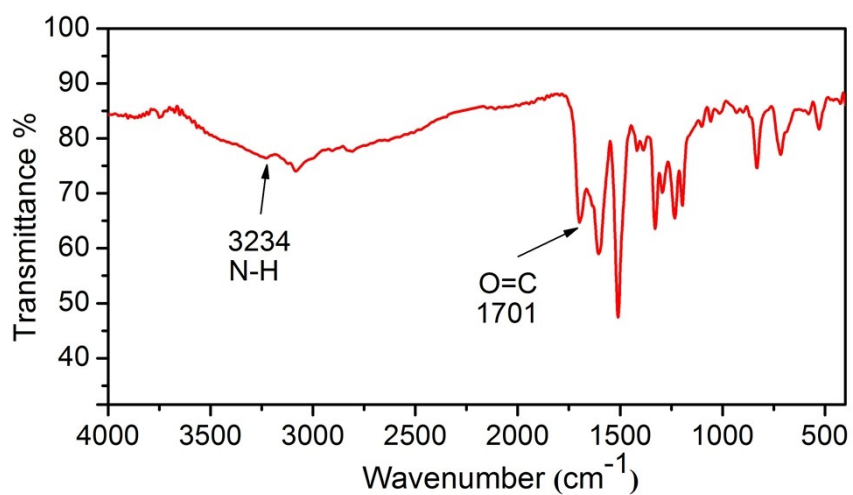

**Fig. S8** FT-IR spectrum of **G** in KBr disk.

**Table S1** Gelation properties of **TG** in organic solvents.

| Entry | Solvents             | State <sup>a</sup> | CGC <sup>b</sup> (%) | T <sub>gel</sub> <sup>c</sup> (°C, wt/v %) |
|-------|----------------------|--------------------|----------------------|--------------------------------------------|
| 1     | methanol             | P                  | \                    | \                                          |
| 2     | ethanol              | P                  | \                    | \                                          |
| 4     | n-butyl alcohol      | P                  | \                    | \                                          |
| 5     | n-propanol           | P                  | \                    | \                                          |
| 6     | n-hexanol            | P                  | \                    | \                                          |
| 7     | formic acid          | P                  | \                    | \                                          |
| 8     | acetic acid          | P                  | \                    | \                                          |
| 9     | propanoic acid       | P                  | \                    | \                                          |
| 10    | hexylic acid         | P                  | \                    | \                                          |
| 11    | butyric acid         | P                  | \                    | \                                          |
| 12    | CHCl <sub>3</sub>    | P                  | \                    | \                                          |
| 13    | DMF                  | S                  | \                    | \                                          |
| 14    | DMF/H <sub>2</sub> O | P                  | \                    | \                                          |

|    |                                        |          |          |                      |
|----|----------------------------------------|----------|----------|----------------------|
| 15 | DMSO                                   | S        | \        | \                    |
| 16 | <b>DMSO/H<sub>2</sub>O (7.4 : 2.6)</b> | <b>G</b> | <b>7</b> | <b>90-92 °C (7%)</b> |
| 17 | acetonitrile                           | P        | \        | \                    |
| 18 | cyclohexanol                           | p        | \        | \                    |
| 19 | cyclohexane                            | P        | \        | \                    |
| 20 | n-hexane                               | P        | \        | \                    |

<sup>a</sup>G, P, and S denote gelation, precipitation and solution, respectively.

<sup>b</sup>The critical gelation concentration (wt %, 10 mg/ml = 1.0 %).

<sup>c</sup>The gelation temperature (°C).

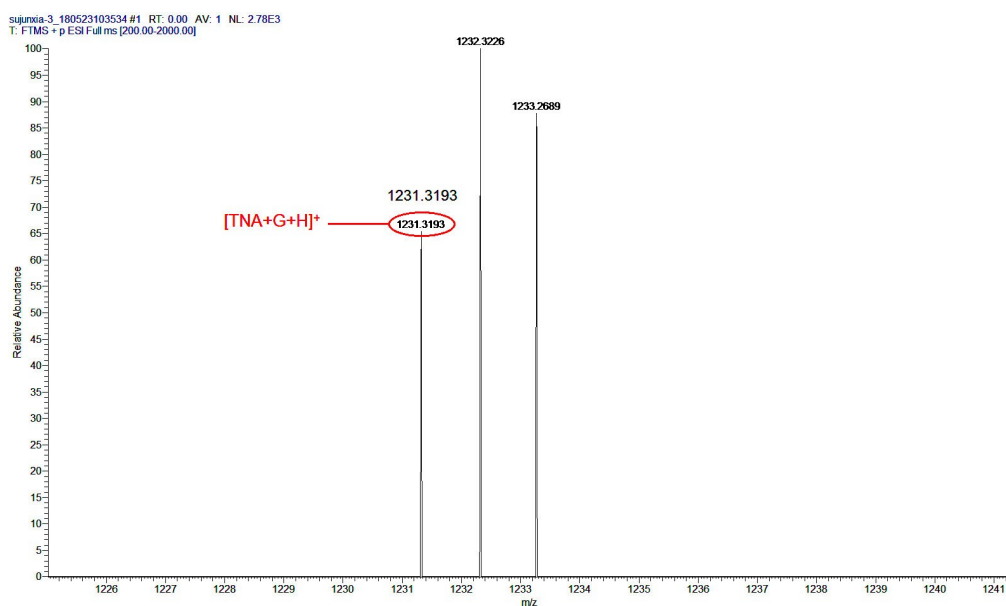

**Fig. S9** Mass spectrum of TG.

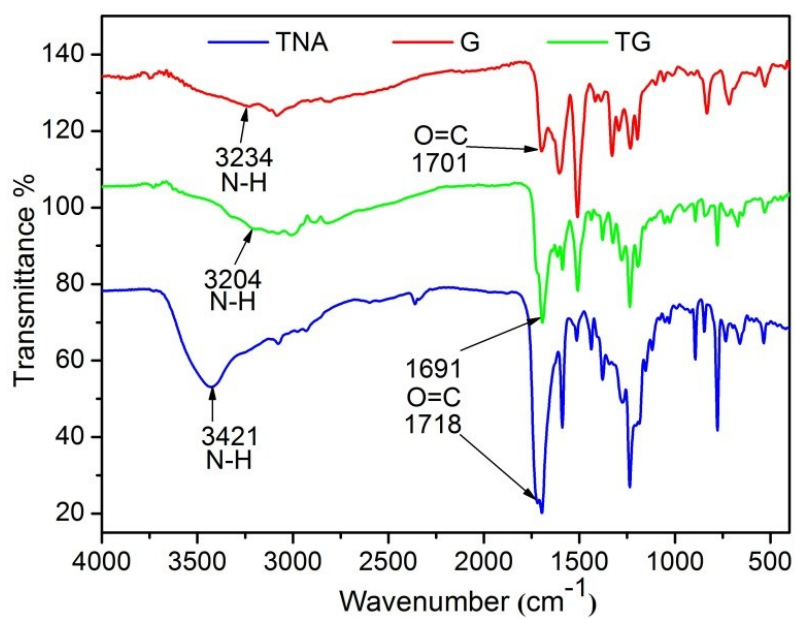

**Fig. S10** FT-IR spectra of TNA, G and TG.

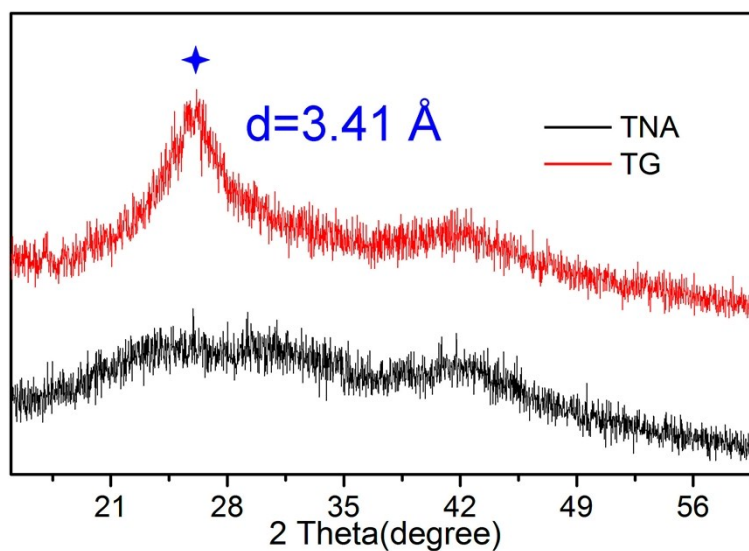

**Fig. S11** XRD pattern of the TNA and TG.

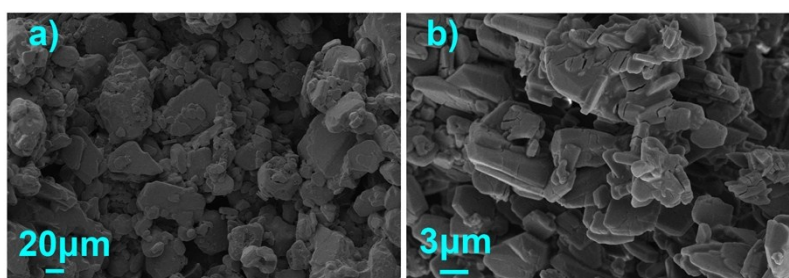

**Fig. S12** FE-SEM images of a) TNA and b) G.

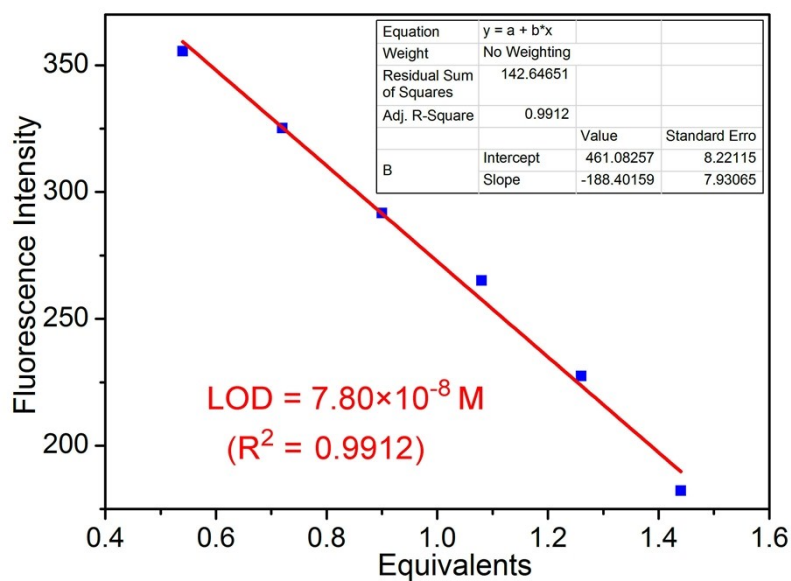

**Fig. S13** Fluorescent spectrum linear range for  $\text{CN}^-$  by addition of various

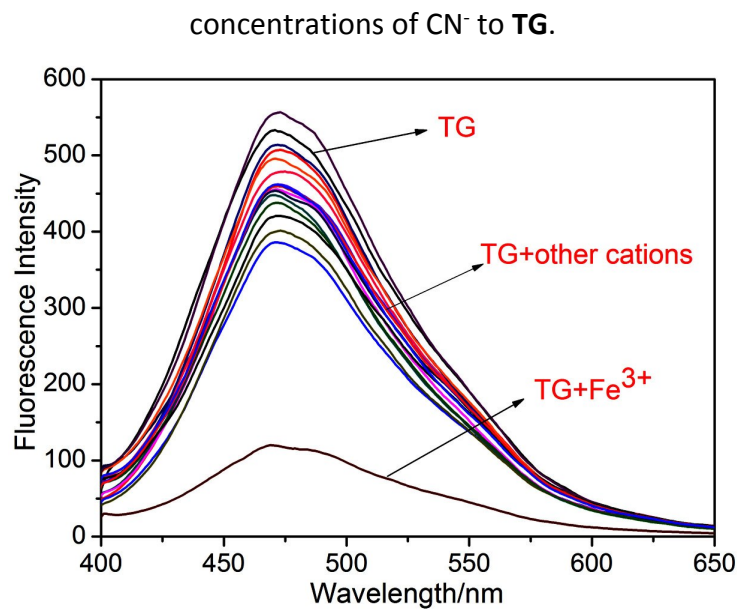

**Fig. S14** Fluorescent spectra changes ( $\lambda_{ex} = 380 \text{ nm}$ ) of **TG** with addition of different cations aqueous solution.

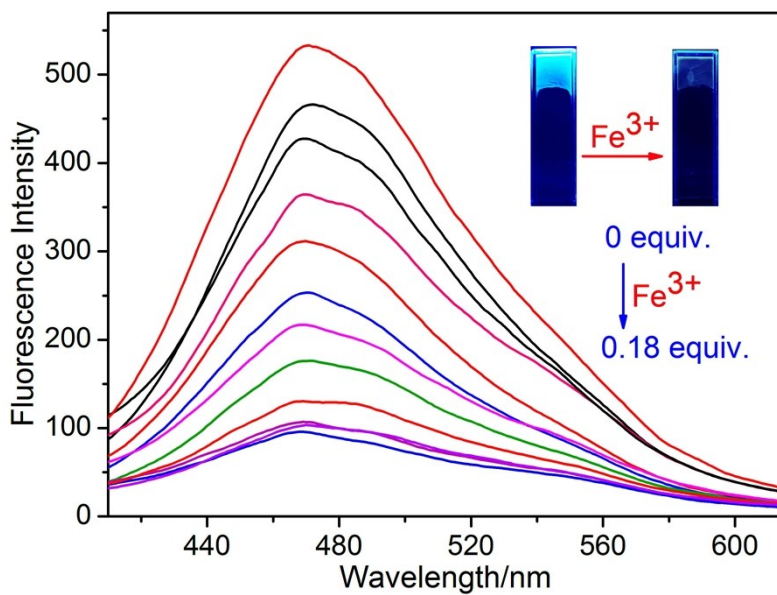

**Fig. S15** Emission spectra of **TG** with increasing amounts of  $\text{Fe}^{3+}$ .

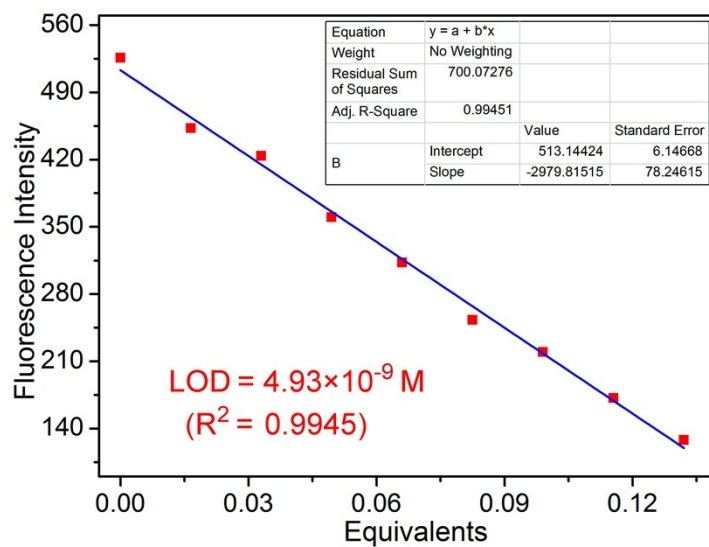

**Fig. S16** Fluorescent spectrum linear range for Fe<sup>3+</sup> by addition of various concentrations of Fe<sup>3+</sup> to TG.

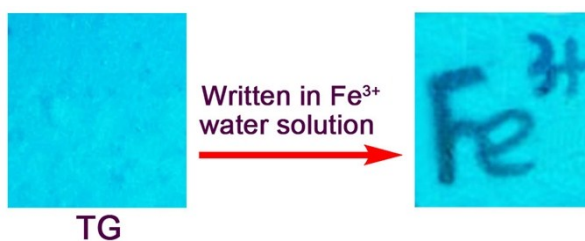

**Fig. S17** Photograph of TG-based film fluorescently detect Fe<sup>3+</sup> in water solution.

**Table S2** The ICP data of TG with Fe<sup>3+</sup>.

| Ion              | Initial concentration (M) | Residual concentration (M) | Absorbing rate (%) |
|------------------|---------------------------|----------------------------|--------------------|
| Fe <sup>3+</sup> | $1 \times 10^{-5}$        | $4.1 \times 10^{-7}$       | 95.89 %            |

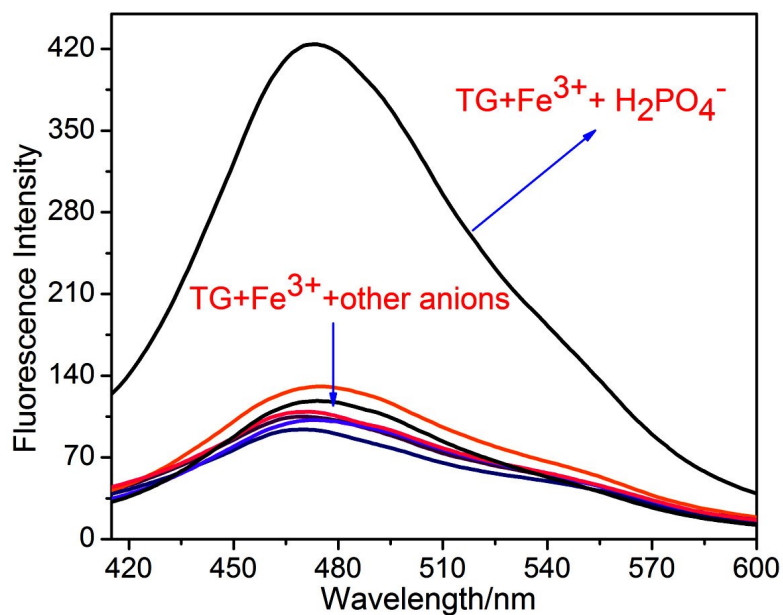

**Fig. S18** Fluorescent spectra changes ( $\lambda_{ex} = 380$  nm) of **TG-Fe** with addition of different anions aqueous solution.

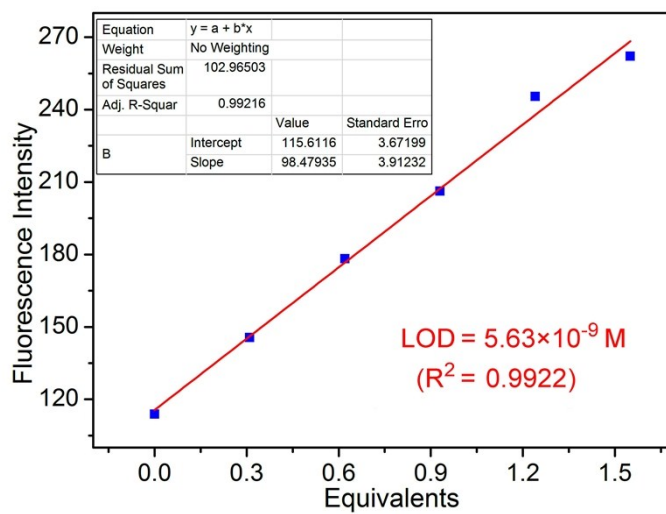

**Fig. S19** Fluorescent spectrum linear range for H<sub>2</sub>PO<sub>4</sub><sup>-</sup> by addition of various concentrations of H<sub>2</sub>PO<sub>4</sub><sup>-</sup> to **TG-Fe**.

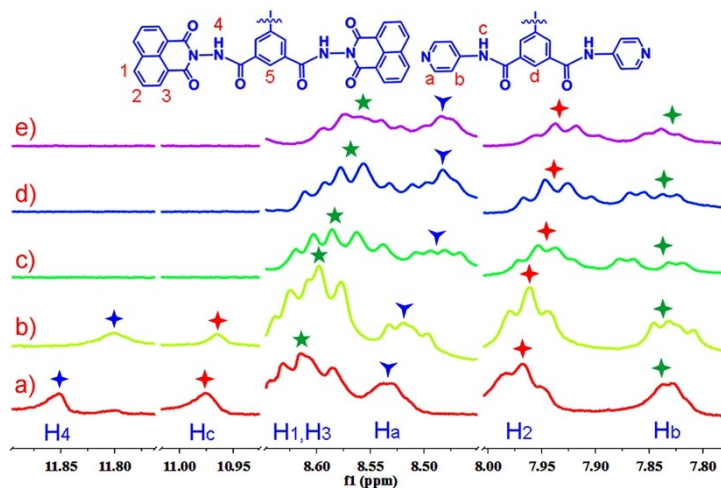

**Fig. S20** Partial  $^1\text{H}$  NMR spectra of 5.0 mg **TG** in  $\text{DMSO-}d_6$  with different equivalent  $\text{CN}^-$  (a) 0 equiv.; (b) 0.2 equiv.; (c) 0.4 equiv.; (d) 1.0 equiv.; (e) 2.0 equiv.

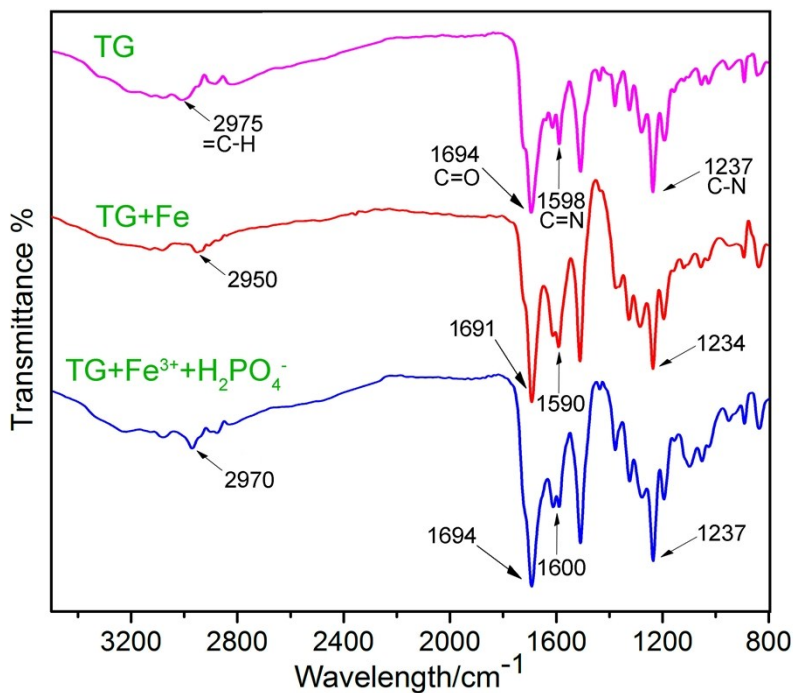

**Fig. S22** FT-IR spectra of **TG**, **TG + Fe<sup>3+</sup>** and **TG-Fe + H<sub>2</sub>PO<sub>4</sub><sup>-</sup>**.

### Notes and references

- S1 Y. Q. Fan, J. Liu, Y. Y. Chen, X. W. Guan, J. Wang, H. Yao, Y. M. Zhang, T. B. Wei, Q. Lin, *J. Mater. Chem. C.*, 2018, **6**, 13331-13335.
- S2 Q. Lin, G. F. Gong, Y. Q. Fan, Y. Y. Chen, J. Wang, X. W. Guan, J. Liu, Y. M. Zhang, H. Yao, T. B. Wei, *Chem. Commun.*, 2019, **55**, 3247-3250.
